# Supplementary material for: Complex sublinear burrows in the deep sea may be constructed by amphipods
Source: PubMed Central journal article supplement (PMC10018091; doi:10.1002/ece3.9867), 2023-03-16
Supplement: ECE3-13-e9867-s002.pdf [file ECE3-13-e9867-s002.pdf]

**Supplementary Table S3.** List of all 146 burrows from still images and identified associated animals species.

| Burrow ID             | Measured | Fig. | Number of Valves | Maerid Amphipod | Amphipod indet. | Munnopsid Isopod | Demostomatid Isopod | Isopod indet. | <i>Munidopsis</i> | Shrimp   | Aspidodiadematiid Urchin | Irregular Urchin | <i>Abyssoecumis</i> | <i>Epidia</i> | Annelid Tube | Glass Sponge |
|-----------------------|----------|------|------------------|-----------------|-----------------|------------------|---------------------|---------------|-------------------|----------|--------------------------|------------------|---------------------|---------------|--------------|--------------|
| 3_565                 | Y        |      | 5                |                 |                 |                  |                     |               |                   |          |                          |                  |                     |               |              |              |
| 3_581                 | Y        |      | 5                |                 |                 |                  |                     |               |                   |          |                          |                  |                     |               |              |              |
| 3_583                 | N        |      | n                |                 |                 |                  |                     |               |                   |          | 1                        |                  |                     |               |              |              |
| 3_589                 | N        |      | 6                |                 |                 |                  |                     |               |                   |          |                          |                  |                     |               |              |              |
| 3_590                 | Y        | 3e   | 4                | 1               |                 |                  |                     |               |                   |          |                          |                  |                     |               |              |              |
| 3_591 left            | N        |      | 4                |                 |                 |                  |                     |               |                   |          |                          |                  |                     |               |              |              |
| 3_591 right           | N        |      | 10               |                 | 1               |                  |                     |               |                   |          |                          | 1                |                     |               |              |              |
| 3_62                  | N        |      | 5                |                 |                 |                  |                     |               |                   |          |                          |                  |                     |               |              |              |
| 3_628                 | N        |      | 6                |                 |                 |                  |                     |               |                   |          |                          |                  |                     |               |              |              |
| 3_632                 | N        |      | n                |                 |                 |                  | 1                   |               |                   |          |                          |                  |                     |               |              |              |
| 3_638 left            | N        |      | 3                |                 |                 |                  |                     |               |                   |          |                          |                  |                     |               |              |              |
| 3_638 right           | N        |      | 6                |                 |                 |                  |                     |               |                   |          | 1                        |                  |                     |               |              |              |
| 3_639                 | N        |      | 5                |                 |                 |                  |                     |               |                   |          |                          |                  |                     |               |              |              |
| 3_646                 | Y        |      | 4                |                 | 1               |                  |                     |               |                   |          |                          |                  |                     |               |              |              |
| 3_648                 | Y        |      | 2                |                 |                 |                  |                     |               |                   |          |                          |                  |                     |               |              |              |
| 3_654                 | Y        |      | 5                |                 |                 |                  |                     |               |                   |          |                          |                  |                     |               |              |              |
| 3_676                 | N        |      | 4                |                 |                 |                  |                     |               |                   |          |                          |                  |                     |               |              |              |
| 3_680                 | Y        |      | 4                |                 |                 |                  |                     |               |                   |          |                          |                  |                     |               |              |              |
| 3_697                 | Y        | 2a   | 4                |                 | 1               | 2                |                     |               |                   |          |                          |                  |                     |               |              |              |
| 3_70                  | Y        |      | 3                |                 |                 |                  |                     |               |                   |          |                          |                  |                     |               |              |              |
| 3_708                 | Y        |      | 3                |                 |                 |                  |                     |               |                   |          |                          |                  |                     |               |              |              |
| 3_714                 | Y        |      | 6                |                 |                 |                  |                     |               |                   |          |                          |                  |                     |               |              |              |
| 3_717                 | N        |      | 6                |                 |                 |                  |                     |               |                   |          |                          |                  |                     |               | 1            |              |
| 3_719                 | Y        |      | 5                |                 | 1               | 1                |                     |               |                   |          |                          |                  |                     |               |              |              |
| 3_722                 | Y        |      | 3                |                 |                 |                  |                     |               |                   |          | 1                        |                  |                     |               |              |              |
| 3_723                 | Y        |      | 5                |                 |                 |                  |                     |               |                   |          |                          |                  |                     |               |              |              |
| 3_726                 | Y        |      | 3                |                 |                 |                  |                     |               |                   |          |                          |                  |                     |               |              |              |
| 3_79                  | Y        |      | 5                |                 | 1               |                  |                     |               |                   |          |                          |                  |                     |               |              |              |
| 3_8                   | N        |      | 4                |                 |                 |                  |                     |               |                   |          |                          |                  |                     |               |              |              |
| 3_83                  | N        |      | 4                |                 |                 |                  |                     |               |                   |          |                          |                  |                     | 1             | 2            |              |
| 3_86                  | N        |      | 5                |                 |                 |                  |                     |               |                   |          |                          |                  |                     |               |              |              |
| 3_98                  | Y        |      | 4                |                 |                 |                  |                     | 1             |                   |          |                          |                  |                     |               |              |              |
| <b>No. Inds. Seen</b> |          |      |                  | <b>5</b>        | <b>16</b>       | <b>22</b>        | <b>1</b>            | <b>13</b>     | <b>1</b>          | <b>2</b> | <b>8</b>                 | <b>4</b>         | <b>1</b>            | <b>2</b>      | <b>21</b>    | <b>1</b>     |
| <b>No. Instances</b>  |          |      |                  | <b>5</b>        | <b>16</b>       | <b>15</b>        | <b>1</b>            | <b>12</b>     | <b>1</b>          | <b>1</b> | <b>8</b>                 | <b>4</b>         | <b>1</b>            | <b>2</b>      | <b>18</b>    | <b>1</b>     |
