# Supplementary material for: Complex sublinear burrows in the deep sea may be constructed by amphipods
Source: PubMed Central journal article supplement (PMC10018091; doi:10.1002/ece3.9867), 2023-03-16
Supplement: ECE3-13-e9867-s003.pdf [file ECE3-13-e9867-s003.pdf]

**Supplementary Table S2.** Details of the 74 burrows examined for dimensional measurements.

| Burrow ID    | Openings | Entrance opening (HV) |          | Intermediate openings (IV) |           |            |           |            |           |            |           |            |           |            |           |            |           | Tail opening (TV) |          |      | End Radius | End Width | Burrow length |
|--------------|----------|-----------------------|----------|----------------------------|-----------|------------|-----------|------------|-----------|------------|-----------|------------|-----------|------------|-----------|------------|-----------|-------------------|----------|------|------------|-----------|---------------|
|              |          | HV Length             | HV Width | IV1 Length                 | IV1 Width | IV2 Length | IV2 Width | IV3 Length | IV3 Width | IV4 Length | IV4 Width | IV5 Length | IV5 Width | IV6 Length | IV6 Width | IV7 Length | IV7 Width | TV Length         | TV Width |      |            |           |               |
| 1_68         | 6        | 3.07                  | 2.88     | 3.94                       | 3.33      | 3.04       | 1.84      | 2.32       | 1.95      | 2.45       | 2.4       |            |           |            |           |            |           |                   | 1.41     | 1.52 | 11.04      | 27.45     | 49.52         |
| 1_73 right   | 7 n      | n                     |          | 3.57                       | 1.55      | 3.09       | 1.6       | 3.57       | 2.24      | 3.04       | 1.79      | 3.04       | 2.27      |            |           |            |           |                   | 2.03     | 2.11 | 14.39      | 25.67 n   |               |
| 1_92         | 3        | 3.2                   | 1.81     | 2.4                        | 2         |            |           |            |           |            |           |            |           |            |           |            |           |                   | 2.51     | 2.16 | 10.64      | 23.43     | 23.3          |
| 1_94         | 4 n      | n                     |          | 2                          | 2.11      | 2.37       | 2.37      |            |           |            |           |            |           |            |           |            |           |                   | 2.51     | 2.32 | 13.09      | 22.5 n    |               |
| 1_106 left   | 4        | 7.25                  | 1.6      | 3.49                       | 1.44      | 2.51       | 1.33      |            |           |            |           |            |           |            |           |            |           |                   | 2        | 1.52 | 10.98      | 21.11     | 25.86         |
| 1_140        | 4        | 9.76                  | 2.99     | 2.85                       | 1.76      | 2.21       | 1.76      |            |           |            |           |            |           |            |           |            |           |                   | 2.08     | 2    | 11.67      | 25.22     | 34.38         |
| 1_252        | 4        | 7.76                  | 1.92     | 5.81                       | 2.21      | 2.75       | 2.61      |            |           |            |           |            |           |            |           |            |           |                   | 2.24     | 2    | 13.17      | 25.62     | 37.98         |
| 1_260        | 4 n      | n                     |          | 3.41                       | 1.76      | 2.83       | 1.44      |            |           |            |           |            |           |            |           |            |           |                   | 2.72     | 1.68 | 11.99      | 25.08 n   |               |
| 1_270        | 6        | 5.46                  | 3.01     | 4.02                       | 2.29      | 3.71       | 1.87      | 2.8        | 1.79      | 2.56       | 1.68      |            |           |            |           |            |           | 1.95              | 1.55     | 10.1 | 21.75      | 48.14     |               |
| 1_305        | 6        | 3.65                  | 1.87     | 3.57                       | 1.39      | 2.91       | 1.39      | 2.8        | 1.79      | 3.23       | 1.55      |            |           |            |           |            |           | 2.77              | 1.97     | 10.8 | 26.97      | 34.86     |               |
| 1_307        | 5        | 5.44                  | 2.85     | 3.44                       | 2.51      | 2.64       | 2.4       |            |           |            |           |            |           |            |           |            |           |                   | 2.77     | 1.87 | 13.38      | 25.27 n   |               |
| 1_309        | 5        | 4.53                  | 2.61     | 4.21                       | 2.4       | 3.07       | 1.65      | 2.8        | 1.65      |            |           |            |           |            |           |            |           |                   | 2.05     | 1.63 | 13.94      | 27.03     | 37.98         |
| 1_311        | 7 n      | n                     |          | 3.36                       | 1.71      | 2.43       | 1.71      | 3.47       | 1.89      | 3.04       | 1.76      | 2.53       | 2.27      |            |           |            |           |                   | 2.13     | 2.03 | 11.51      | 23.7 n    |               |
| 1_361 right  | 5 n      | n                     |          | 2.4                        | 1.87      | 2.27       | 1.97      | 2.37       | 2.08      |            |           |            |           |            |           |            |           |                   | 2.69     | 1.52 | 12.85      | 26.07 n   |               |
| 1_414        | 5        | 6.08                  | 1.71     | 3.31                       | 1.44      | 2.13       | 1.44      | 1.79       | 1.81      |            |           |            |           |            |           |            |           |                   | 1.25     | 1.97 | 15.06      | 28.31     | 39.1          |
| 1_444        | 8 n      | n                     |          | 5.44                       | 2.77      | 5.81       | 3.07      | 5.14       | 2.88      | 4.34       | 2.91      | 5.04       | 2.43      | 3.84       | 2.83      |            |           |                   | 2.53     | 1.89 | 11.91      | 41.37 n   |               |
| 1_482        | 3        | 3.07                  | 1.81     | 2.96                       | 1.57      |            |           |            |           |            |           |            |           |            |           |            |           |                   | 2.19     | 1.39 | 7.89       | 15.06     | 21.14         |
| 1_507        | 2        | 4.34                  | 1.71     |                            |           |            |           |            |           |            |           |            |           |            |           |            |           |                   | 2.96     | 1.47 | 9.06       | 17.33     | 11.01         |
| 1_554        | 8        | 3.55                  | 2.19     | 2.29                       | 1.55      | 3.33       | 2.11      | 3.01       | 1.95      | 2.4        | 1.65      | 2.56       | 2.08      | 2.4        | 1.89      |            |           |                   | 2.27     | 2.08 | 16.42      | 32.39     | 60.88         |
| 1_580        | 4        | 12.45                 | 2.19     | 4.48                       | 2.19      | 3.57       | 2.24      |            |           |            |           |            |           |            |           |            |           |                   | 2.35     | 1.81 | 14.9       | 27.37     | 42.99         |
| 1_599        | 4        | 4                     | 2.61     | 3.52                       | 2.29      | 3.89       | 2.45      |            |           |            |           |            |           |            |           |            |           |                   | 3.09     | 2.59 | 15.41      | 28.25     | 33.21         |
| 1_609        | 4        | 11.67                 | 1.68     | 3.44                       | 2.56      | 3.36       | 2.48      |            |           |            |           |            |           |            |           |            |           |                   | 2.4      | 2.27 | 15.3       | 33.64     | 44.51         |
| 1_618        | 4 n      | n                     |          | 4.53                       | 3.81      | 3.33       | 2.85      | 3.71       | 2.16      |            |           |            |           |            |           |            |           |                   | 2.56     | 1.25 | 14.69      | 32.52     | 43.74         |
| 1_622        | 5        | 16.9                  | 1.76     | 3.55                       | 2.32      | 3.23       | 1.92      | 3.52       | 2.13      |            |           |            |           |            |           |            |           |                   | 2.48     | 2.19 | 18.34      | 32.09     | 51.36         |
| 1_629        | 3        | 5.65                  | 1.97     | 3.6                        | 1.52      | 2          |           |            |           |            |           |            |           |            |           |            |           |                   | 1.44     | 0.95 | 18.5       | 21.24     | 20.66         |
| 1_640        | n        | n                     | n        | 5.57                       | 3.65      | 4.98       | 2.64      | 3.71       | 2.99      |            |           |            |           |            |           |            |           |                   | 3.86     | 2.37 | 17.35      | 38.09 n   |               |
| 1_664        | 2        | 5.25                  | 1.39     |                            |           |            |           |            |           |            |           |            |           |            |           |            |           |                   | 2.11     | 1.36 | 11.51      | 20.04     | 12.69         |
| 1_685        | 4 n      | n                     |          | 3.76                       | 3.49      | 4.66       | 4.21      | 3.49       | 2.75      |            |           |            |           |            |           |            |           |                   | 2.4      | 2.13 | 11.22      | 21.88 n   |               |
| 1_729 left   | 6 n      | n                     |          | 3.44                       | 2.83      | 3.23       | 2.35      | 3.52       | 2.13      | 3.15       | 2.35      |            |           |            |           |            |           |                   | 3.68     | 2.37 | 11.43      | 28.28 n   |               |
| 1_731        | 5 n      | n                     |          | 4.16                       | 3.12      | 3.36       | 2.72      | 3.92       | 3.12      |            |           |            |           |            |           |            |           |                   | 2.56     | 2.48 | 15.59      | 29.83 n   |               |
| 1_762        | 4        | 3.78                  | 1.23     | 2.37                       | 1.17      | 2.64       | 1.39      |            |           |            |           |            |           |            |           |            |           |                   | 2.03     | 1.52 | 9.54       | 18.23     | 25.11         |
| 1_774        | 3        | 6.37                  | 1.39     | 3.36                       | 1.36      |            |           |            |           |            |           |            |           |            |           |            |           |                   | 2.64     | 1.71 | 11.78      | 23.46     | 20.74         |
| 2_258        | 3        | 6.48                  | 1.36     | 2.24                       | 1.17      |            |           |            |           |            |           |            |           |            |           |            |           |                   | 2.24     | 1.39 | 8.53       | 17.67     | 16.69         |
| 2_265        | 4 n      | n                     |          | 2.77                       | 2.24      | 2.51       | 2.03      | 2.64       | 1.87      |            |           |            |           |            |           |            |           |                   | 1.65     | 1.28 | 10.13      | 21.75     | 36.33         |
| 3_45         | 5        | 7.65                  | 1.95     | 4.93                       | 1.89      | 3.73       | 1.57      | 3.07       | 1.97      |            |           |            |           |            |           |            |           |                   | 2.45     | 2.16 | 9.44       | 21.54     | 39.93         |
| 3_53         | 8 n      | n                     |          | 5.33                       | 2.91      | 4.96       | 3.44      | 4.45       | 3.28      | 3.55       | 2.64      | 3.41       | 2.32      | 3.55       | 2.83      | 2.53       | 2.93      |                   | 2.32     | 2.32 | 11.46      | 24.71     | 72.07         |
| 3_70         | 3        | 8.05                  | 2.21     | 3.86                       | 2.53      |            |           |            |           |            |           |            |           |            |           |            |           |                   | 2.91     | 2.32 | 11.14      | 22.84     | 23.32         |
| 3_79         | 5        | 2.43                  | 1.47     | 3.89                       | 1.47      | 2.67       | 1.71      | 2.61       | 1.95      |            |           |            |           |            |           |            |           |                   | 1.89     | 1.73 | 9.3        | 22.55     | 30.09         |
| 3_98         | 4 n      | n                     |          | 3.84                       | 2.29      | 3.28       | 2.24      |            |           |            |           |            |           |            |           |            |           |                   | 2.64     | 2.4  | 9.6        | 21.03 n   |               |
| 3_100        | 3        | 6.32                  | 1.36     | 2.37                       | 2.08      |            |           |            |           |            |           |            |           |            |           |            |           |                   | 1.65     | 1.6  | 8.37       | 17.46     | 20.55         |
| 3_202        | 6        | 2.48                  | 0.91     | 4.61                       | 0.99      | 3.17       | 1.07      | 2.11       | 1.33      | 2.16       | 1.63      |            |           |            |           |            |           | 1.95              | 1.33     | 7.54 | 16.69      | 40.44     |               |
| 3_211        | 3        | 7.73                  | 1.63     | 2.37                       | 1.89      |            |           |            |           |            |           |            |           |            |           |            |           |                   | 1.87     | 1.6  | 6.32       | 15.62     | 23.19         |
| 3_233        | 4        | 6.93                  | 1.25     | 2.35                       | 1.36      | 2.43       | 1.55      |            |           |            |           |            |           |            |           |            |           |                   | 1.97     | 1.49 | 9.86       | 22.95     | 28.17         |
| 3_250        | 5 n      | n                     |          | 2.96                       | 2.45      | 2.61       | 1.95      | 2.32       | 1.84      |            |           |            |           |            |           |            |           |                   | 2.75     | 1.41 | 12.13      | 26.25 n   |               |
| 3_307 right  | 5        | 8.02                  | 1.36     | 3.57                       | 1.84      | 2.93       | 1.76      | 2.67       | 1.47      |            |           |            |           |            |           |            |           |                   | 2.67     | 1.76 | 12.93      | 25.22     | 36.78         |
| 3_313        | 5        | 8.34                  | 1.31     | 3.89                       | 1.17      | 3.12       | 1.92      | 2.96       | 1.92      |            |           |            |           |            |           |            |           |                   | 2.99     | 2.48 | 12.66      | 27.67     | 37.16         |
| 3_317 bottom | 7        | 9.62                  | 3.28     | 3.12                       | 1.76      | 3.04       | 1.92      | 3.76       | 2.24      | 3.71       | 2         | 2.56       | 2.56      |            |           |            |           |                   | 2.32     | 2.24 | 7.81       | 21.16     | 57.36         |
| 3_330        | 3        | 7.2                   | 1.68     | 4.48                       | 1.84      |            |           |            |           |            |           |            |           |            |           |            |           |                   | 3.52     | 1.84 | 13.3       | 21.91     | 22.23         |
| 3_352 bottom | 6        | 19.64                 | 5.62     | 2.08                       | 2.08      | 5.62       | 2.56      | 4.72       | 2.16      | 3.71       | 2.64      |            |           |            |           |            |           |                   | 2.8      | 2.64 | 22.18      | 43.21     | 76.82         |

**Supplementary Table S2.** Details of the 74 burrows examined for dimensional measurements.

|                 |                 |            |            |            |            |      |      |      |      |      |     |            |            |           |           |               |
|-----------------|-----------------|------------|------------|------------|------------|------|------|------|------|------|-----|------------|------------|-----------|-----------|---------------|
| 3_384           | 3               | 3.86       | 1.84       | 2.77       | 1.57       |      |      |      |      |      |     | 2.11       | 1.47       | 5.92      | 13.59     | 18.66         |
| 3_394           | 5 n             | n          |            | 4.74       | 3.41       | 3.63 | 2.56 | 4.58 | 2.99 |      |     | 3.6        | 2.32       | 13.91     | 32.87 n   |               |
| 3_415           | 3               | 11.49      | 1.15       | 3.07       | 1.31       |      |      |      |      |      |     | 2.29       | 1.6        | 9.78      | 21.96     | 24.44         |
| 3_421           | 4               | 11.04      | 2.35       | 3.92       | 2.11       | 3.31 | 2.4  |      |      |      |     | 2.32       | 1.81       | 9.94      | 26.2      | 38.52         |
| 3_461           | 4               | 6          | 2.67       | 4.13       | 2.64       | 3.68 | 2.56 |      |      |      |     | 2.64       | 2.51       | 14.47     | 31.05     | 32.68         |
| 3_470           | 3 n             | n          |            | 2          | 1.33       |      |      |      |      |      |     | 2.43       | 1.07       | 5.46      | 12.53 n   |               |
| 3_492 boton     | 4               | 5.28       | 1.41       | 2.56       | 1.55       | 2.99 | 1.39 |      |      |      |     | 2.19       | 1.23       | 7.73      | 15.03     | 27.51         |
| 3_493 left      | 3 n             | n          |            | 2.59       | 1.41       |      |      |      |      |      |     | 2.4        | 1.2        | 10.21     | 22.1 n    |               |
| 3_508           | 5               | 10.4       | 1.84       | 4.56       | 1.68       | 2.56 | 2.72 | 3.68 | 2.37 |      |     | 3.39       | 2.35       | 17.59     | 37.61     | 46.46         |
| 3_543 left      | 5 n             | n          |            | 3.68       | 2.29       | 3.76 | 2.48 | 3.09 | 2.11 |      |     | 2.93       | 2.4        | 11.46     | 22.82     | 34.6          |
| 3_543 right     | 4               | 5.44       | 1.63       | 3.04       | 2.05       | 2.88 | 1.47 |      |      |      |     | 2.21       | 1.84       | 6.16      | 14.71     | 23.75         |
| 3_565           | 5 n             | n          |            | 4.37       | 1.95       | 3.23 | 1.87 | 4.24 | 2.29 |      |     | 2.72       | 2.19       | 11.99     | 27.24     | 32.89         |
| 3_581           | 5               | 1.44       | 1.73       | 2          | 1.57       | 2.35 | 1.65 | 1.97 | 1.79 |      |     | 1.71       | 1.71       | 8.13      | 18.39     | 22.36         |
| 3_590           | 4               | 7.17       | 2.19       | 3.49       | 1.76       | 2.27 | 1.87 |      |      |      |     | 2.59       | 1.84       | 11.99     | 25.11     | 28.89         |
| 3_646           | 4               | 7.04       | 1.76       | 5.78       | 1.39       | 3.81 | 1.71 |      |      |      |     | 2.67       | 1.6        | 10.69     | 22.2      | 33.37         |
| 3_648           | 2 n             | n          |            | 1.47       | 1.2        |      |      |      |      |      |     | 2.03       | 1.92       | 10.1      | 26.07 n   |               |
| 3_654           | 5               | 4.8        | 1.81       | 3.25       | 1.39       | 2.64 | 1.92 | 2.77 | 1.81 |      |     | 2.61       | 1.84       | 8.8       | 21.43     | 29.88         |
| 3_680           | 4 n             | n          |            | 1.52       | 1.39       | 2.35 | 2.51 |      |      |      |     | 1.81       | 2.03       | 11.46     | 23.43 n   |               |
| 3_697           | 4               | 4.85       | 1.79       | 5.17       | 1.87       | 3.17 | 1.71 |      |      |      |     | 2.43       | 1.76       | 12.07     | 22.74     | 25.46         |
| 3_708           | 3               | 8.64       | 1.65       | 3.6        | 1.81       |      |      |      |      |      |     | 2.11       | 1.52       | 9.78      | 18.34     | 20.63         |
| 3_714           | 6 n             | n          |            | 6.8        | 1.92       | 4.66 | 2.05 | 4.4  | 2.4  | 3.63 | 2.4 | 2.67       | 2.4        | 17.25     | 34.41     | 60.99         |
| 3_719           | 5 n             | n          |            | 4.26       | 3.73       | 4.29 | 2.85 | 3.44 | 2.67 |      |     | 3.55       | 3.57       | 18.58     | 36.06     | 63.71         |
| 3_722           | 3               | 6.29       | 1.52       | 2.43       | 1.73       |      |      |      |      |      |     | 2.67       | 2.19       | 8.74      | 21.59     | 19.83         |
| 3_723           | 5 n             | n          |            | 2.72       | 1.52       | 1.89 | 1.65 | 2.61 | 2.43 |      |     | 2.03       | 1.84       | 11.38     | 23.67     | 38.38         |
| 3_726           | 3               | 3.68       | 1.52       | 2.45       | 1.28       |      |      |      |      |      |     | 2.35       | 1.09       | 6         | 12.23     | 15.91         |
|                 | <b>Openings</b> | <b>HVL</b> | <b>HVV</b> | <b>IVL</b> | <b>IVW</b> |      |      |      |      |      |     | <b>TVL</b> | <b>TVW</b> | <b>ER</b> | <b>EW</b> | <b>TotalL</b> |
| <b>Average:</b> | 4.44            | 6.77       | 1.95       | 3.33       | 2.09       |      |      |      |      |      |     | 2.43       | 1.88       | 11.73     | 24.46     | 34.27         |
| <b>min</b>      | 2               | 1.44       | 0.91       | 1.47       | 0.99       |      |      |      |      |      |     | 1.25       | 0.95       | 5.46      | 12.23     |               |
| <b>max</b>      | 11              | 19.64      | 5.62       | 6.8        | 4.21       |      |      |      |      |      |     | 3.86       | 3.57       | 22.18     | 43.21     |               |
| <b>st dev</b>   |                 | 3.53426    | 0.75727    | 0.93797    | 0.58576    |      |      |      |      |      |     | 0.51908    | 0.45577    | 3.33479   | 6.398816  | 14.5459       |
