# Supplementary material for: Complex sublinear burrows in the deep sea may be constructed by amphipods
Source: PubMed Central journal article supplement (PMC10018091; doi:10.1002/ece3.9867), 2023-03-16
Supplement: ECE3-13-e9867-s005.pdf [file ECE3-13-e9867-s005.pdf]

**Supplementary Table S1.** Location and depth of stations where burrows were observed: USBL (seafloor) position data for the Ocean-Floor Observation System (OFOS) at three stations where burrows were observed and ship position data for epi-benthic sledge (EBS) deployment that collected the maerid amphipod specimen. Transects of the OFOS were approximately 1 km each, transect of the EBS was approximately 2 km.

|                                          | <b>Time (UTC)</b> | <b>Latitude</b> | <b>Longitude</b> | <b>Depth (m)</b> |
|------------------------------------------|-------------------|-----------------|------------------|------------------|
| <b>OFOS (equipment position)</b>         |                   |                 |                  |                  |
| <b>Station 1 Start</b>                   | 28/07/2022 02:05  | 54- 33.219' N   | 172- 34.922' W   | 3512             |
| <b>Station 1 End</b>                     | 28/07/2022 04:10  | 54- 33.536' N   | 172- 34.273' W   | 3507             |
| <b>Station 2 Start</b>                   | 29/07/2022 02:58  | 54- 32.158' N   | 174- 37.532' W   | 3650             |
| <b>Station 2 End</b>                     | 29/07/2022 04:43  | 54- 32.498' N   | 174- 36.825' W   | 3653             |
| <b>Station 3 Start</b>                   | 30/07/2022 23:30  | 53- 48.314' N   | 173- 38.258' W   | 3588             |
| <b>Station 3 End</b>                     | 31/07/2022 01:32  | 53- 47.690' N   | 173- 38.262' W   | 3587             |
| <b>EBS (ship position)</b>               |                   |                 |                  |                  |
| <b>Station 1 Start (deployment)</b>      | 27/07/2022 16:51  | 54- 31.423' N   | 172- 36.583' W   | 3516             |
| <b>Station 1 (EBS at seafloor)</b>       | 27/07/2022 18:46  | 54- 32.142' N   | 172- 33.544' W   | 3499             |
| <b>Station 1 (end of transect)</b>       | 27/07/2022 19:48  | 54- 32.527' N   | 172- 31.923' W   | 3502             |
| <b>Station 1 End (equipment on deck)</b> | 27/07/2022 22:04  | 54- 33.536' N   | 172- 34.273' W   | 3504             |
